## Effects of antidiabetic drugs on mortality risks in individuals with type 2 diabetes: A prospective cohort study of UK Biobank participants

Elisa Araldi<sup>1-3</sup>, Catherine R. Jutzeler<sup>4</sup>, Michael Ristow<sup>1,5</sup>

<sup>1</sup>Energy Metabolism Laboratory, Institute of Translational Medicine, Swiss Federal Institute of Technology (ETH) Zürich, Schwerzenbach, CH-8603, Switzerland;

<sup>2</sup>Center for Thrombosis and Hemostasis and Preventive Cardiology and Preventive Medicine, Center for Cardiology, University Medical Center of the Johannes Gutenberg University Mainz, Mainz, D-55131, Germany;

<sup>3</sup>Systems Medicine Laboratory, Department of Medicine and Surgery, Università degli Studi di Parma, Parma, I-43125, Italy;

<sup>4</sup>Biomedical Data Science Lab, Institute of Translational Medicine, Swiss Federal Institute of Technology (ETH) Zürich, Zürich, CH-8008, Switzerland;

<sup>5</sup>Institute of Experimental Endocrinology, Charité Universitätsmedizin Berlin, Humboldt University, Berlin, D-10117, Germany

The authors have withdrawn this manuscript owing to having been informed by the UK Biobank Research Development Team that the use of a subset of prescription data in our analyses does not comply with the Control of Patient Information (COPI, 2020) notice.

Specifically, 'these prescription data could only be used for the purpose of COVID-19 research'. While we have analyzed the impact of these prescription drugs on COVID-19 mortality, as contained in the present manuscript, any additional analyses, as also contained within, appear to be incongruent with the COPI notice.

We hence abide by the request of UK Biobank Research Development Team to withdraw the entire publication. We apologize for any inconvenience this may cause. It should be noted that the scientific content, methods and validity of the results in the entire publication remain unaffected by both the request and the subsequent retraction.

Therefore, the authors do not wish this work to be cited as reference for the project. If you have any questions, please contact the corresponding author.
